# Supplementary material
Source: PubMed Central journal article supplement (PMC4516628)
Supplement: NIHMS702250-supplement-Supp_FigureS1-S7___Tables1.pdf [file NIHMS702250-supplement-Supp_FigureS1-S7___Tables1.pdf]

# **STriatal-Enriched protein tyrosine Phosphatase (STEP) Regulates the PTP $\alpha$ /Fyn Signaling Pathway**

Jian Xu, Pradeep Kurup, Ethan Foscue and Paul J. Lombroso

## **Supplemental Information**

### **Materials and Methods**

#### **Cholesterol and protein content quantification**

Sequential fractionations of DMS were obtained by sucrose gradient fractionation. Total cholesterol level in each fraction was measured by the Amplex Red cholesterol assay kit (Invitrogen) following manufacturer's protocol. Briefly, 50  $\mu$ l samples were incubated with equal amount of Amplex Red solution (300  $\mu$ M Amplex Red reagent containing 2 U/mL HRP, 2 U/mL cholesterol oxidase and 0.2 U/mL cholesterol esterase). The reactions were incubated at 37° C for 30 min. Cholesterol content was measured by absorbance at 562 nm using a microplate reader (BioTek, Winooski, VT). Total protein concentration was quantified using BCA protein assay kit (Pierce) following manufacturer's protocol. Cholesterol concentration was normalized to protein content.

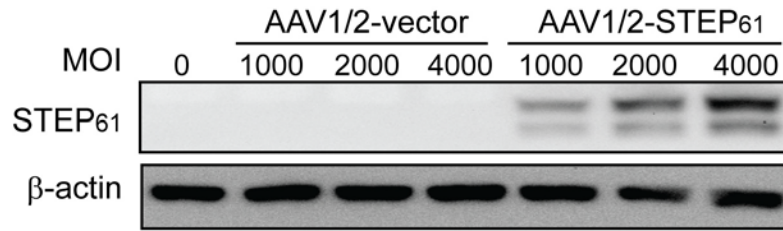

**Figure S1.** Determination of AAV1/2-STEP<sub>61</sub> virus titer. STEP KO mouse corticostriatal cultures were infected with AAV1/2 hybrid virus containing STEP<sub>61</sub> sequence at several multiplicity of infection at DIV 5 for 10 days. STEP<sub>61</sub> expression was evaluated with anti-STEP antibody. β-actin was probed as a loading control. Representative blots were shown from four independent experiments (n = 4).

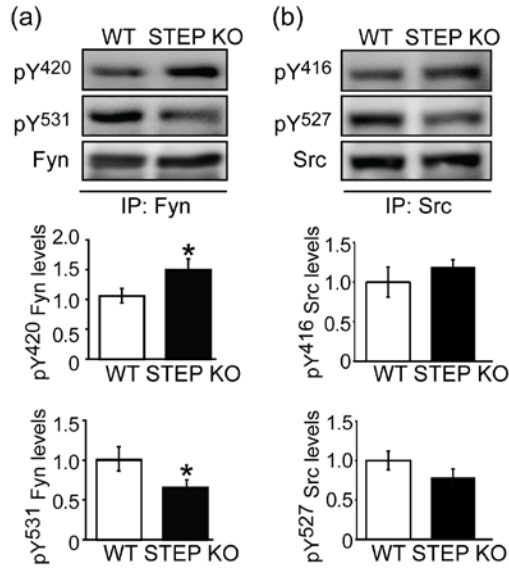

**Figure S2.** Phosphorylation of Fyn but not Src is altered in STEP KO mouse brain. Fyn (a) or Src (b) was immunoprecipitated from WT and STEP KO striatal homogenates using specific antibodies. Phosphorylation of regulatory sites (pY<sup>420</sup> and pY<sup>531</sup> in Fyn; pY<sup>416</sup> and pY<sup>527</sup> in Src) was determined using phospho-specific antibodies. Quantification of phosphorylation levels were normalized to immunoprecipitated Fyn or Src. Data were expressed as mean  $\pm$  SEM (\* $p$  < 0.05, Student's  $t$ -test;  $n = 6$ ).

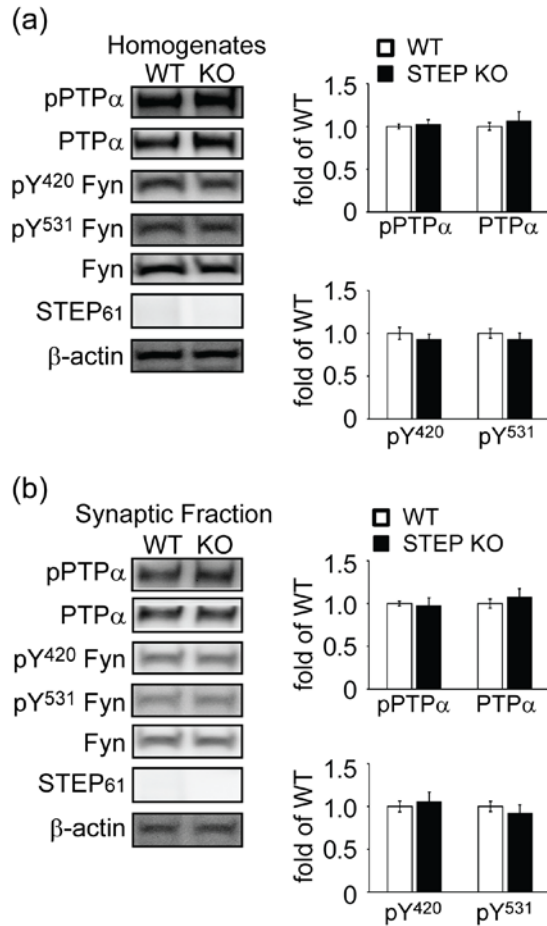

**Figure S3.** Phosphorylation level of PTP $\alpha$  at Tyr<sup>789</sup> does not change in STEP KO mouse cerebellum. Total homogenates (a) or crude synaptic membrane fractions (b) from wild-type (WT) and STEP KO (KO) mouse cerebellum were used to determine tyrosine phosphorylation levels of PTP $\alpha$  (pY<sup>789</sup>), Fyn (pY<sup>420</sup> and pY<sup>531</sup>), and total protein levels as indicated in the figure. Quantification of phosphorylation levels were normalized to total protein levels and then to  $\beta$ -actin as a loading control. All data were expressed as mean  $\pm$  SEM (\* $p$  < 0.05, \*\* $p$  < 0.01, Student's  $t$ -test;  $n$  = 6).

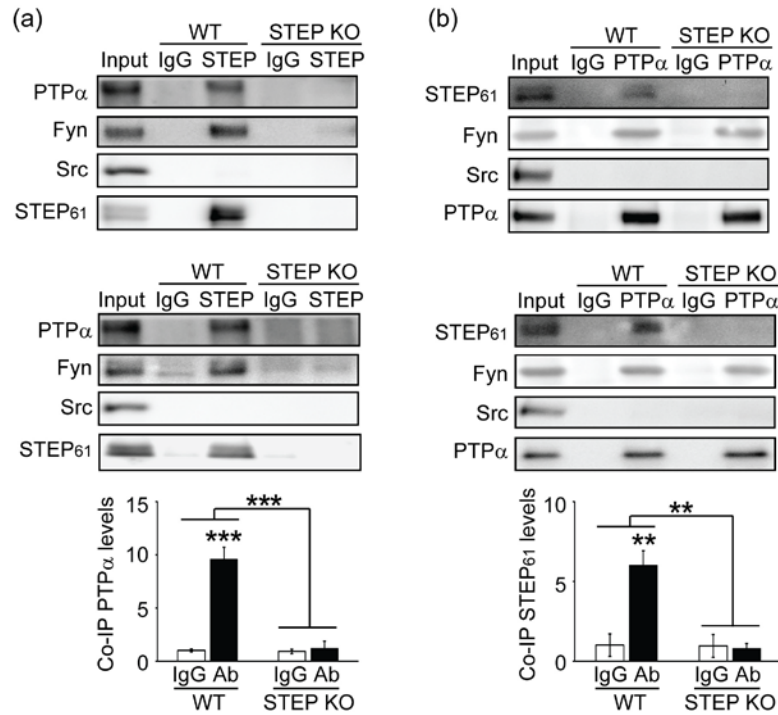

**Figure S4.** Reciprocals of co-immunoprecipitation of STEP<sub>61</sub> and PTP $\alpha$  in mouse striatal lysates. WT or STEP KO mouse striatal lysates (300  $\mu$ g) were incubated with mouse IgG and anti-STEP (23E5) mouse monoclonal antibody (a) or goat IgG and anti-PTP $\alpha$  goat polyclonal antibody (b) overnight at 4 °C. Co-immunoprecipitation of STEP interacting proteins (a) or PTP $\alpha$  interacting proteins (b) was probed with antibodies indicated in the figure. Data were expressed as mean  $\pm$  SEM (\*\* $p$  < 0.01, \*\*\* $p$  < 0.001, two-way ANOVA with *post hoc* Tukey's test; n = 3).

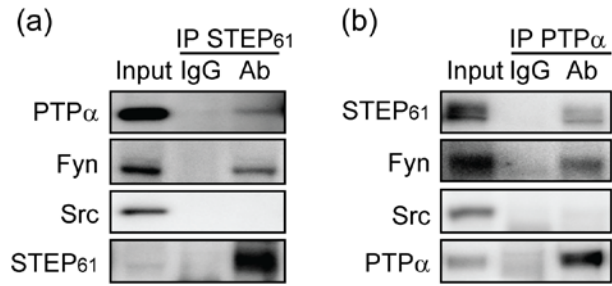

**Figure S5.** STEP<sub>61</sub> is associated with PTP $\alpha$  in rat corticostriatal cultures. Rat primary corticostriatal lysates (300  $\mu$ g) were incubated with mouse IgG and anti-STEP (23E5) mouse monoclonal antibody (a) or goat IgG and anti-PTP $\alpha$  goat polyclonal antibody (b) overnight at 4 °C. Co-immunoprecipitation of STEP interacting proteins (a) or PTP $\alpha$  interacting proteins (b) was probed with antibodies indicated in the figure. Representative blots were shown from three independent experiments (n = 3).

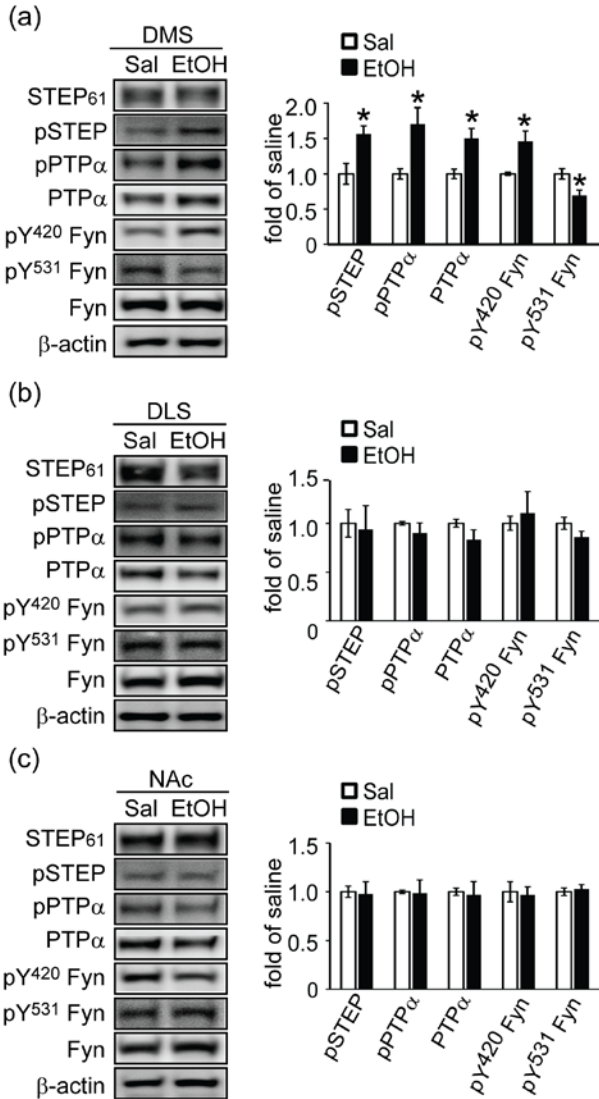

**Figure S6.** Repeated ethanol administration results in increased phosphorylation of PTPα at Tyr<sup>789</sup> through phosphorylation and inactivation of STEP<sub>61</sub>. Male C57BL/6 mice (2-3 months) were treated with ethanol (EtOH) subchronically (2g/kg, i.p. daily for 7 days). Synaptosomal fractions (P2) from dorsomedial striatum (a), dorsolateral striatum (b) or nucleus accumbens (c) were used for western blotting with phospho-specific and pan antibodies as shown in the figure. Quantification of phosphorylation levels were normalized to total protein levels and then to β-actin as a loading control. Data were expressed as mean ± SEM (\**p* < 0.05, \*\**p* < 0.01, Student's *t*-test; *n* = 5).

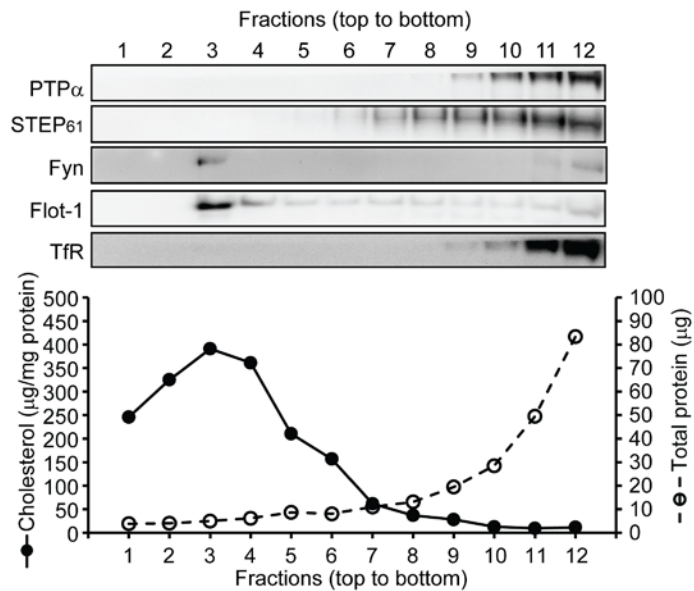

**Figure S7.** Lipid rafts preparation from mouse DMS. DMS from male C57BL/6 mice (2-3 months) was subjected to sucrose gradient fractionation (details in Methods) to obtain 12 subsequent fractions. Distribution of PTP $\alpha$ , STEP<sub>61</sub> and Fyn was visualized by specific antibodies. Flotillin-1 (Flot-1) and transferrin receptor (TfR) were used as markers for rafts and non-rafts fractions, respectively. Cholesterol content was measured by the Amplex Red cholesterol assay kit (Invitrogen) and total protein content was quantified using BCA protein assay kit (Pierce) following manufactures' protocols.



**Table S1.** Antibodies used in this study

| Antibody                                      | Immunogen                                                                                          | Host   | Dilution | Source                                   |
|-----------------------------------------------|----------------------------------------------------------------------------------------------------|--------|----------|------------------------------------------|
| anti-STEP (23E5)                              | N-terminal of rat STEP <sub>46</sub>                                                               | Mouse  | 1:1000   | Santa Cruz Biotechnology, Santa Cruz, CA |
| anti-pSTEP                                    | Synthetic phosphopeptide around Ser <sup>221</sup> of mouse STEP <sub>61</sub>                     | rabbit | 1:500    | Paul <i>et al.</i> , 2003                |
| anti-pPTP $\alpha$                            | Synthetic phosphopeptide around Tyr <sup>789</sup> of human PTP $\alpha$                           | rabbit | 1:1000   | Cell Signaling Technologies, Beverly, MA |
| anti-PTP $\alpha$                             | N-terminal GST-tagged fusion protein corresponding to residues 505-793 of human PTP $\alpha$       | rabbit | 1:2000   | Millipore, Billerica, MA                 |
| anti-phospho-Src family (Tyr <sup>416</sup> ) | Synthetic phosphopeptide around Tyr <sup>416</sup> of human Src                                    | rabbit | 1:1000   | Cell Signaling Technologies              |
| anti-phospho-Src family (Tyr <sup>527</sup> ) | Synthetic phosphopeptide around Tyr <sup>527</sup> of human Src                                    | rabbit | 1:1000   | Cell Signaling Technologies              |
| anti-Fyn                                      | N-terminus of human Fyn                                                                            | rabbit | 1:1000   | Santa Cruz Biotechnology                 |
| anti-Src                                      | N-terminus of human Src                                                                            | rabbit | 1:1000   | Santa Cruz Biotechnology                 |
| anti-ERK2                                     | C-terminus of rat ERK2                                                                             | rabbit | 1:5000   | Santa Cruz Biotechnology                 |
| anti-GST                                      | Recombinant glutathione S-transferase from <i>Shistosoma japonicum</i> expressed in <i>E. coli</i> | rabbit | 1:5000   | Santa Cruz Biotechnology                 |
| anti-Flot-1                                   | A synthetic peptide corresponding to residues in human Flotillin-1                                 | rabbit | 1:1000   | Millipore                                |
| anti-TfR                                      | N-terminus (aa3-28) of human transferrin receptor                                                  | mouse  | 1:1000   | Life Technologies, Gaithersburg, MD      |
| anti- $\beta$ -actin                          | gizzard actin of avian origin                                                                      | mouse  | 1:5000   | Santa Cruz Biotechnology                 |
| anti-rabbit IgG                               | rabbit IgG (H+L), Peroxidase Conjugated                                                            | goat   | 1:5000   | Thermo Scientific, Fremont, CA           |
| anti-mouse IgG                                | mouse IgG (H+L), Peroxidase Conjugated                                                             | goat   | 1:5000   | Thermo Scientific                        |
